# Supplementary material for: A variety of novel complexes constructed from biphenyl-3,3′,4,4′-tetracarboxylate and flexible bis(imidazole) ligands
Source: Royal Society of Chemistry journal article supplement (doi:10.1039/b909590j), 2010-01-01
Supplement: b909590j.pdf [file b909590j.pdf]

## Supplementary Information

**Table S1 Selected bond distances (Å) and angles (°) for complexes 1–6<sup>a</sup>**

| 1                   |            |                     |            |                   |            |
|---------------------|------------|---------------------|------------|-------------------|------------|
| Co(1)-O(4)#1        | 2.009(4)   | Co(1)-O(1)          | 2.038(3)   | Co(1)-N(1)#2      | 2.041(4)   |
| Co(1)-N(4)          | 2.041(4)   | Co(1)-O(2)          | 2.348(4)   |                   |            |
| O(4)#1-Co(1)-O(1)   | 107.19(15) | O(4)#1-Co(1)-N(1)#2 | 106.06(17) | O(1)-Co(1)-N(1)#2 | 130.87(17) |
| O(4)#1-Co(1)-N(4)   | 94.54(16)  | O(1)-Co(1)-N(4)     | 104.93(15) | N(1)#2-Co(1)-N(4) | 107.36(17) |
| N(4)-Co(1)-O(2)     | 86.64(15)  | O(4)#1-Co(1)-O(2)   | 166.03(14) | O(1)-Co(1)-O(2)   | 59.22(13)  |
| N(1)#2-Co(1)-O(2)   | 86.77(16)  |                     |            |                   |            |
| 2                   |            |                     |            |                   |            |
| Ni(1)-N(1)          | 2.023(3)   | Ni(1)-N(3)          | 2.027(3)   | Ni(1)-O(1)        | 2.174(2)   |
| Ni(1)-O(2)          | 2.103(2)   | Ni(1)-O(3)#3        | 2.082(2)   | Ni(1)-O(4)#3      | 2.189(2)   |
| N(1)-Ni(1)-N(3)     | 98.63(12)  | N(1)-Ni(1)-O(3)#3   | 100.39(10) | N(3)-Ni(1)-O(3)#3 | 96.35(11)  |
| N(1)-Ni(1)-O(2)     | 98.55(10)  | N(3)-Ni(1)-O(2)     | 95.05(11)  | O(3)#3-Ni(1)-O(2) | 156.12(9)  |
| N(1)-Ni(1)-O(1)     | 159.96(10) | N(3)-Ni(1)-O(1)     | 86.18(11)  | O(3)#3-Ni(1)-O(1) | 98.37(9)   |
| O(2)-Ni(1)-O(1)     | 61.54(8)   | N(1)-Ni(1)-O(4)#3   | 92.96(11)  | N(3)-Ni(1)-O(4)#3 | 156.71(11) |
| O(3)#3-Ni(1)-O(4)#3 | 61.54(9)   | O(2)-Ni(1)-O(4)#3   | 103.16(9)  | O(1)-Ni(1)-O(4)#3 | 89.81(9)   |
| 3                   |            |                     |            |                   |            |
| Ni(1)-N(1)          | 2.032(4)   | Ni(1)-N(3)          | 2.029(3)   | Ni(1)-O(1)        | 2.073(3)   |
| Ni(1)-O(2)          | 2.173(3)   | Ni(1)-O(3)#4        | 2.055(2)   | Ni(1)-O(4)#4      | 2.215(3)   |
| N(3)-Ni(1)-N(1)     | 95.89(14)  | N(3)-Ni(1)-O(3)#4   | 99.16(12)  | N(1)-Ni(1)-O(3)#4 | 96.16(12)  |
| N(3)-Ni(1)-O(1)     | 99.84(11)  | N(1)-Ni(1)-O(1)     | 94.64(13)  | O(3)#4-Ni(1)-O(1) | 157.01(11) |
| N(3)-Ni(1)-O(2)     | 161.88(11) | N(1)-Ni(1)-O(2)     | 88.90(12)  | O(3)#4-Ni(1)-O(2) | 97.68(10)  |
| O(1)-Ni(1)-O(2)     | 62.27(10)  | N(3)-Ni(1)-O(4)#4   | 92.55(13)  | N(1)-Ni(1)-O(4)#4 | 157.21(12) |
| O(3)#4-Ni(1)-O(4)#4 | 61.54(10)  | O(1)-Ni(1)-O(4)#4   | 104.73(11) | O(2)-Ni(1)-O(4)#4 | 89.60(11)  |
| 4                   |            |                     |            |                   |            |
| Ni(1)-N(1)#5        | 2.065(3)   | N(3)-Ni(1)          | 2.053(3)   | Ni(1)-O(2)        | 2.045(2)   |
| Ni(1)-O(6)          | 2.095(2)   | Ni(1)-O(8)          | 2.118(2)   | Ni(1)-O(7)        | 2.132(2)   |
| O(2)-Ni(1)-N(3)     | 171.86(11) | O(2)-Ni(1)-N(1)#5   | 91.07(10)  | N(3)-Ni(1)-N(1)#5 | 94.62(11)  |
| O(2)-Ni(1)-O(6)     | 83.76(9)   | N(3)-Ni(1)-O(6)     | 90.47(11)  | N(1)#5-Ni(1)-O(6) | 89.57(11)  |

|                   |            |                 |           |                   |           |
|-------------------|------------|-----------------|-----------|-------------------|-----------|
| O(2)-Ni(1)-O(8)   | 90.40(8)   | N(3)-Ni(1)-O(8) | 95.61(10) | N(1)#5-Ni(1)-O(8) | 87.80(10) |
| O(6)-Ni(1)-O(8)   | 173.55(8)  | O(2)-Ni(1)-O(7) | 86.23(9)  | N(3)-Ni(1)-O(7)   | 88.32(10) |
| N(1)#5-Ni(1)-O(7) | 176.29(10) | O(6)-Ni(1)-O(7) | 92.67(10) | O(8)-Ni(1)-O(7)   | 89.66(9)  |

5

|                   |            |                   |            |                     |            |
|-------------------|------------|-------------------|------------|---------------------|------------|
| N(1)-Zn(1)        | 2.026(3)   | N(4)-Zn(1)#6      | 2.008(3)   | O(1)-Zn(1)          | 1.951(3)   |
| O(3)-Zn(1)#7      | 1.979(3)   |                   |            |                     |            |
| O(1)-Zn(1)-O(3)#6 | 112.35(13) | O(1)-Zn(1)-N(4)#6 | 113.84(14) | O(3)#7-Zn(1)-N(4)#6 | 101.71(14) |
| O(1)-Zn(1)-N(1)   | 94.24(13)  | O(3)#7-Zn(1)-N(1) | 117.48(14) | N(4)#6-Zn(1)-N(1)   | 117.84(14) |

6

|                     |            |                   |           |                   |            |
|---------------------|------------|-------------------|-----------|-------------------|------------|
| Cd(1)-N(1)#8        | 2.271(3)   | Cd(1)-N(3)        | 2.276(3)  | Cd(1)-O(2)        | 2.384(3)   |
| Cd(1)-O(6)          | 2.398(3)   | Cd(1)-O(4)#9      | 2.404(3)  |                   |            |
| N(1)#8-Cd(1)-N(3)   | 94.59(12)  | N(1)#8-Cd(1)-O(2) | 95.13(11) | N(3)-Cd(1)-O(2)   | 135.63(10) |
| N(1)#8-Cd(1)-O(6)   | 174.64(10) | N(3)-Cd(1)-O(6)   | 90.70(11) | O(2)-Cd(1)-O(6)   | 80.46(9)   |
| N(1)#8-Cd(1)-O(4)#9 | 102.42(12) | N(3)-Cd(1)-O(4)#9 | 83.20(11) | O(2)-Cd(1)-O(4)#9 | 135.92(10) |
| O(6)-Cd(1)-O(4)#9   | 79.01(11)  |                   |           |                   |            |

Symmetry transformations used to generate equivalent atoms: #1  $-x+1, y+1/2, -z+1/2$ , #2  $-x+1, -y, -z$  for **1**; #3  $-x+1/2, y-1/2, -z+3/2$  for **2**; #4  $-x+3/2, y+1/2, -z+3/2$  for **3**; #5  $-x+1, -y+2, -z+2$  for **4**, #6  $-x+2, -y, -z$ , #7  $-x+2, -y, -z+1$  for **5**; #8  $x+1, y, z$ , #9  $-x+2, -y+2, -z+1$  for **6**.

**Table S2 Hydrogen Bonds Data for Complexes 2, 4 and 6<sup>a</sup>**

| D-H $\cdots$ A       | d(D-H)/Å | d(H $\cdots$ A)/Å | <DHA/deg | d(D $\cdots$ A)/Å |
|----------------------|----------|-------------------|----------|-------------------|
| <b>2</b>             |          |                   |          |                   |
| O6-H6A $\cdots$ O5#1 | 0.852    | 2.096             | 161.03   | 2.915             |
| O6-H6B $\cdots$ O2#1 | 0.851    | 2.028             | 170.98   | 2.872             |
| <b>4</b>             |          |                   |          |                   |
| O6-H6C $\cdots$ O5   | 0.843    | 2.034             | 154.46   | 2.818             |
| O6-H6D $\cdots$ O9#2 | 0.845    | 1.922             | 165.53   | 2.748             |
| O7-H7C $\cdots$ O4#2 | 0.849    | 1.886             | 160.31   | 2.701             |
| O7-H7D $\cdots$ O5#3 | 0.847    | 1.904             | 174.10   | 2.748             |
| O8-H8A $\cdots$ O5#3 | 0.850    | 1.900             | 163.05   | 2.724             |
| O8-H8B $\cdots$ O3   | 0.849    | 1.895             | 157.52   | 2.699             |
| O9-H9A $\cdots$ O4   | 0.855    | 2.020             | 152.30   | 2.805             |

|                      |       |       |        |       |
|----------------------|-------|-------|--------|-------|
| O9-H9B $\cdots$ O7   | 0.850 | 2.144 | 162.93 | 2.967 |
| 6                    |       |       |        |       |
| O6-H6B $\cdots$ O2#4 | 0.854 | 1.941 | 161.64 | 2.765 |

Symmetry transformations used to generate equivalent atoms: #1  $x, -y+1, z-1/2$  for **2**; #2  $-x+1, -y+1, -z+2$ , #3  $x+1, y, z$  for **4**;  
#4  $-x+2, -y+2, -z+1$  for **6**.

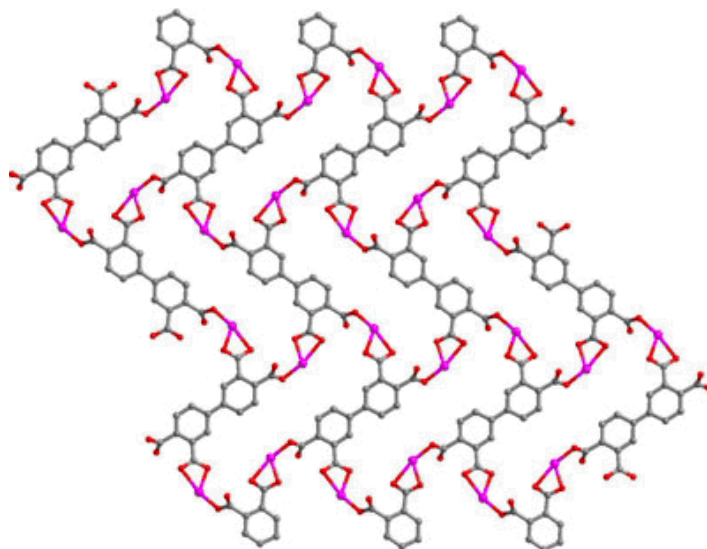

**Figure S1** 2D [Co<sub>2</sub>(bptc)] layer of compound **1**.

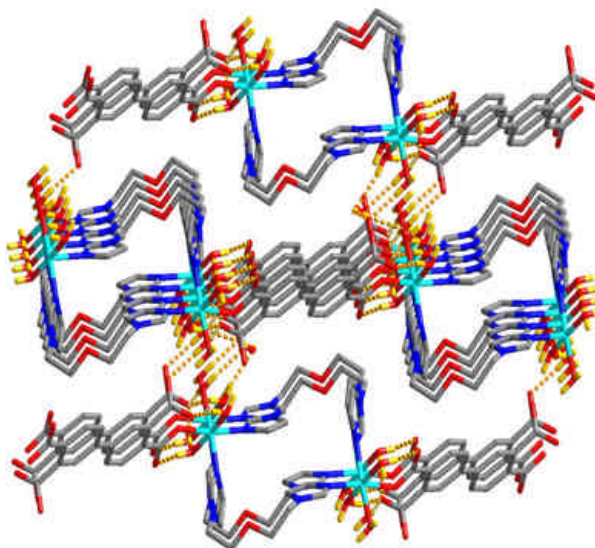

**Figure S2** 3D supramolecular framework of compound **4** (the dotted golden line represents the O $\cdots$ H $\cdots$ O H-bonds).

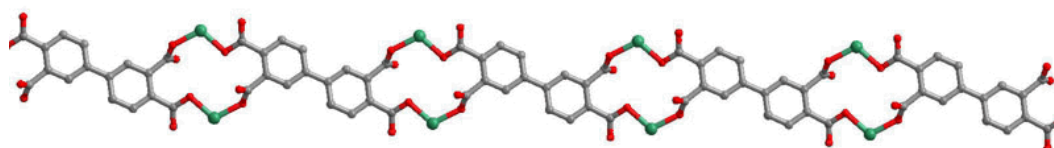

**Figure S3** 1D [Zn(bptc)<sub>0.5</sub>] polymeric chain of compound **5**.

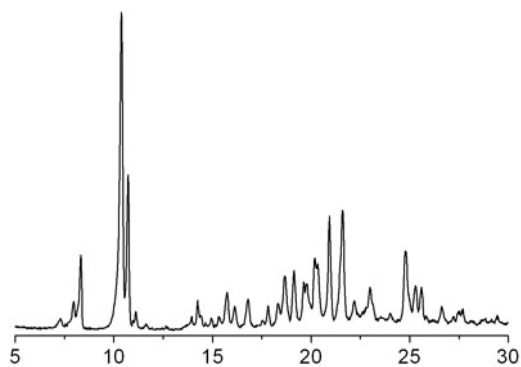

The powder X-ray diffraction (PXRD) pattern of compound **3**

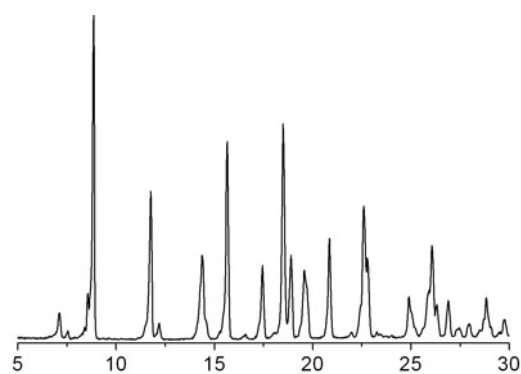

The powder X-ray diffraction (PXRD) pattern of compound **4**

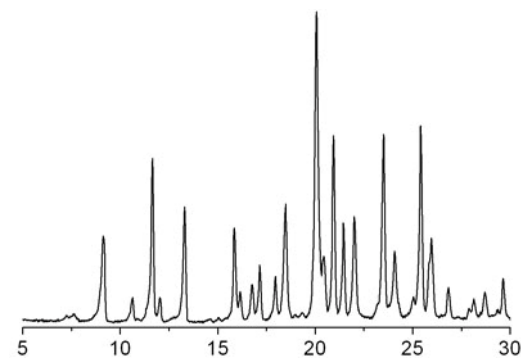

The powder X-ray diffraction (PXRD) pattern of compound **5**

**Figure S4.** The measured powder X-ray diffraction (PXRD) patterns (a) for **3**; (b) for **4**; (c) for **5**.
